# Supplementary material for: Uncoupling of transcriptomic and cytological differentiation in mouse spermatocytes with impaired meiosis
Source: PubMed Central journal article supplement — Mol Biol Cell. 2019 Mar 1;30(5):717–28. doi: 10.1091/mbc.E18-10-0681 (PMC6589690; doi:10.1091/mbc.e18-10-0681), 2019-03-01

# Supplemental Materials

*Molecular Biology of the Cell*

Fine et al.

## Supplemental Materials

**Figure S1. Systematic variance is apparent across batches and litters.** Colors correspond to genotype and shapes correspond to sample age, as indicated. Dataset information refers to the incorporation of a previously published dataset (baseline) into our dataset (Prdm9). (A) Principal component 1 (PC1) versus principal component 2 (PC2) of PCA run on all samples. (B,C,D) Principal component 1 (PC1) versus principal component 2 (PC2) of PCA run on 8 dpp, 12 dpp, and 16 dpp samples respectively. Icon labels correspond to designations of litters.

**Figure S2. Differential expression between *Prdm9*<sup>-/-</sup> and *Prdm9*<sup>+/+</sup> samples is detected irrespective of batch effects.** Colors correspond to genotype and shapes correspond to sample age, as indicated. (A) Principal component 1 (PC1) versus principal component 3 (PC3) of PCA run on all ComBat-adjusted samples. (B) Quantification of average frequencies of spermatogenic and meiotic prophase substages represented at each time point in the samples of germ cells retrieved from *Prdm9*<sup>-/-</sup> testes. (C,D,E) Principal component 1 (PC1) versus principal component 2 (PC2) of PCA run on ComBat-adjusted data from samples at 8 dpp, 12 dpp, and 16 dpp respectively. Icon labels correspond to designations of litters.

**Figure S3. *Prdm9* transcript abundance reflects the genetic mutation.** (A) Log<sub>2</sub>(TPM+1) expression of *Prdm9* at 8, 12, and 16 dpp. \*\*\* represents FDR < 0.0001. (B) Sashimi plot of transcript alignment to exons of *Prdm9* in *Prdm9*<sup>+/+</sup> (blue) and *Prdm9*<sup>-/-</sup> (red). The x-axis represents the length of the *Prdm9* gene and the y-axis represents the number of reads aligned to a given region. Horizontal, curved lines represent the mRNA reads bridging an intron, with the number of reads spanning the intron denoted in the middle of the line.

**Figure S4. Sex-chromosome gene expression reflects impaired meiotic sex-chromosome inactivation (MSCI) in *Prdm9*<sup>-/-</sup> samples.** (A) Expression of each XY gene at 8, 12, and 16 dpp, relative to mean expression at 8 dpp in *Prdm9*<sup>+/+</sup> samples. (B) Expression of each autosomal gene at 8, 12, and 16 dpp, relative to mean expression at 8 dpp in *Prdm9*<sup>+/+</sup> samples. Colors denote genotypes in A and B, as indicated.

**Figure S5. PMCA identifies substage-specific transcripts in wild-type and *Prdm9*<sup>-/-</sup> samples.** (A) Relative expression of transcripts assigned to each substage based on their wild-type expression patterns. (B) Relative expression of transcripts assigned to each substage based on their *Prdm9*<sup>-/-</sup> expression patterns.

**Table S1. Sample information.** Age, genotype, dataset, and litter information for each sample, including cytological counts for each sample.

**Table S2. Gene expression and differential analysis results.** Transcript info, including transcript abundance, differential expression statistics, chromosomal location, and substage specificity. Unknown or undefined results are indicated with a “Z”.

**Table S3. Gene Ontology (GO) term enrichment analysis results.** GO terms enriched among differentially expressed genes at 16 dpp.

**Table S4. Differential expression gene counts among substage specific genes.** Numbers and percentages of differentially expressed genes that had been assigned to specific substages of meiotic progression in *Prdm9*<sup>+/+</sup> and *Prdm9*<sup>-/-</sup> samples.

**(A)**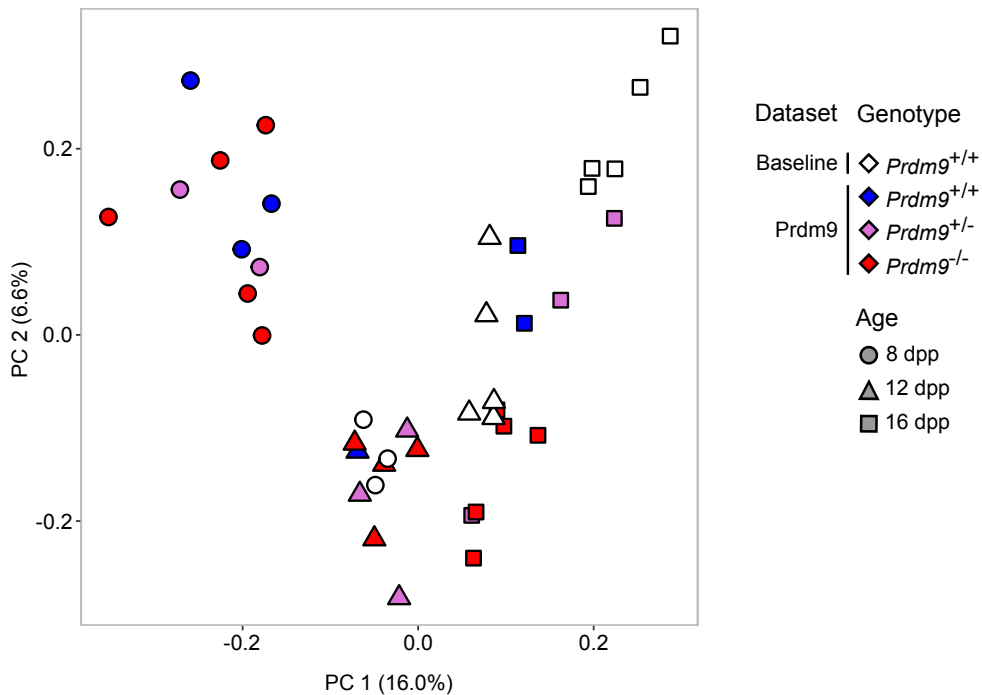**(B)**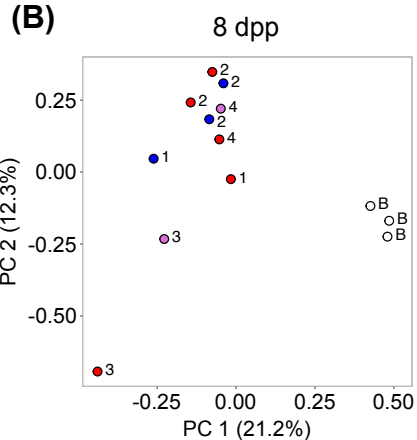**(C)**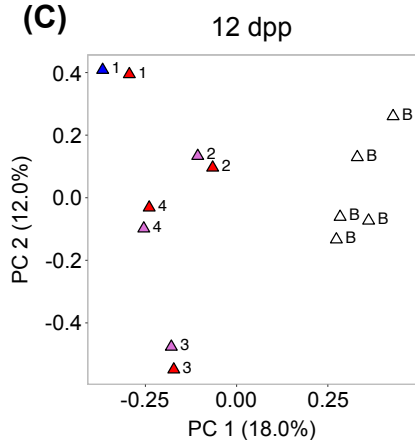**(D)**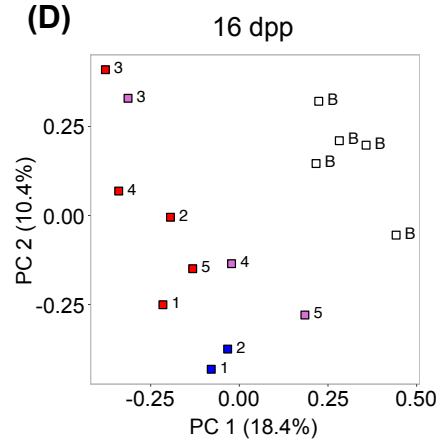

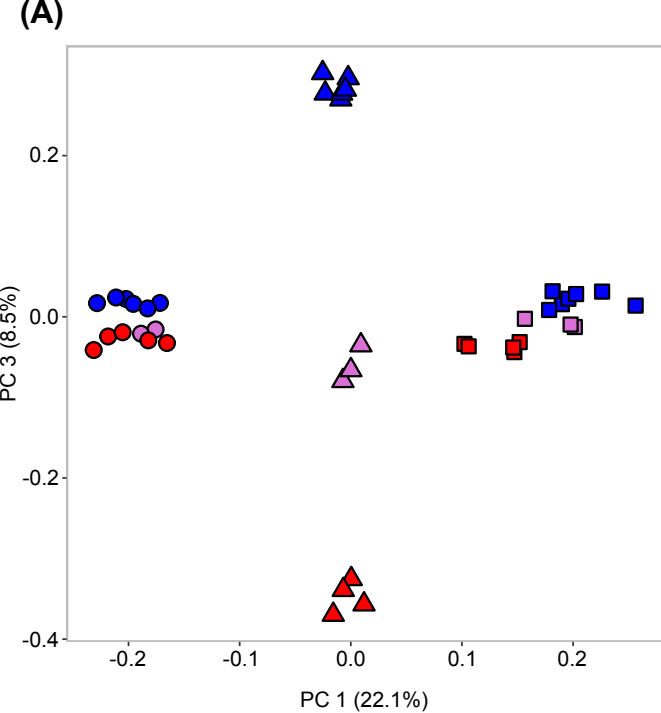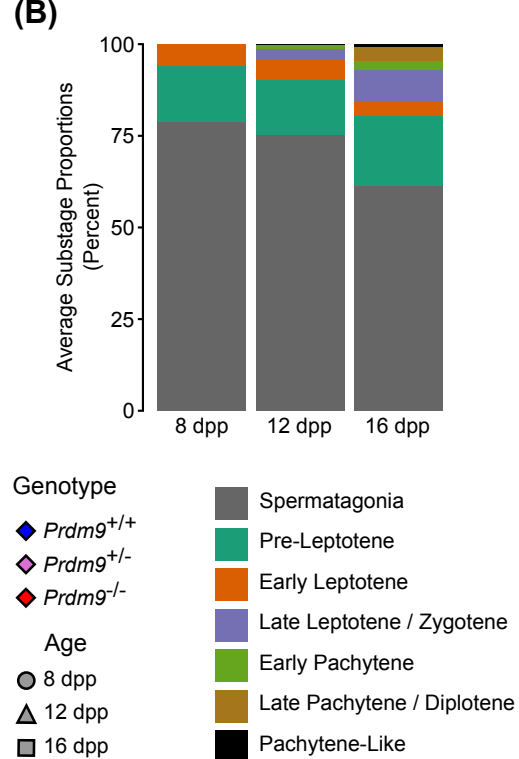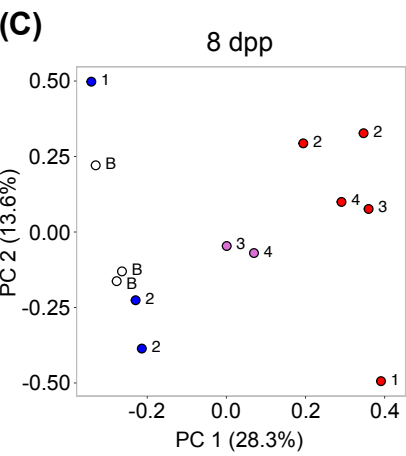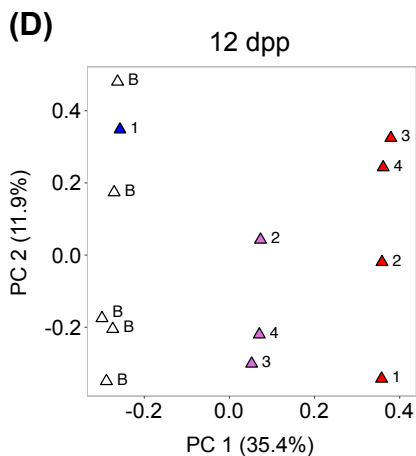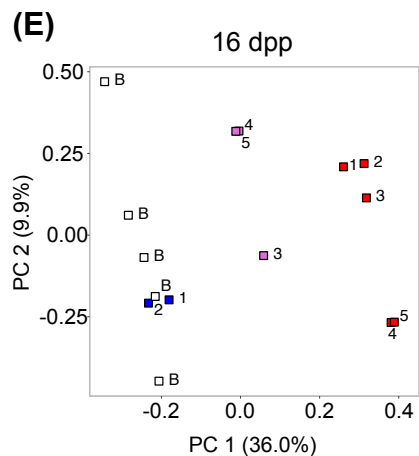

**(A)**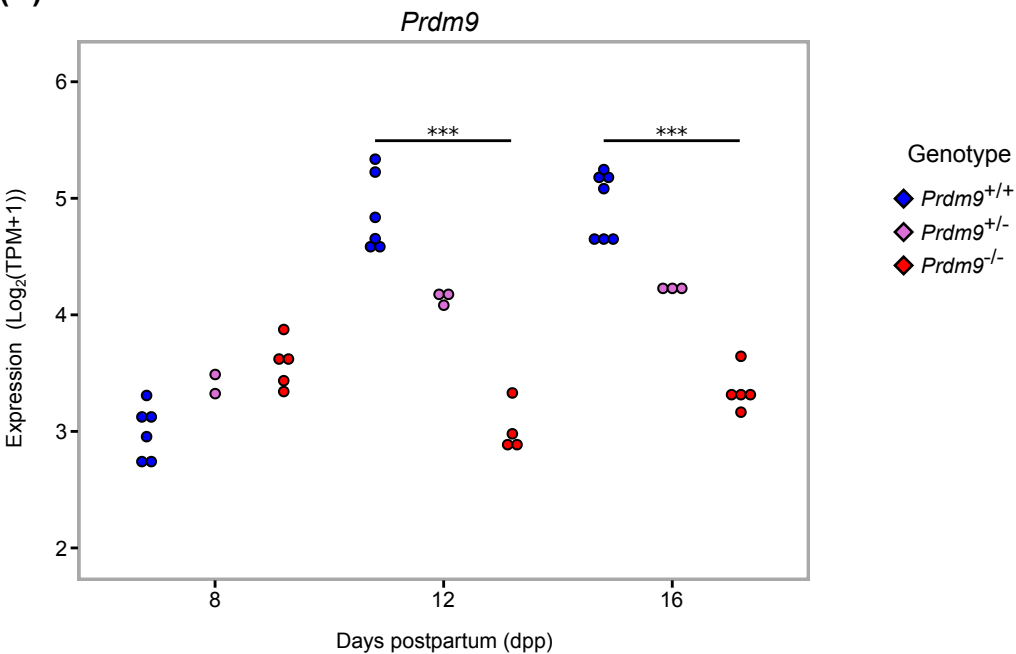**(B)**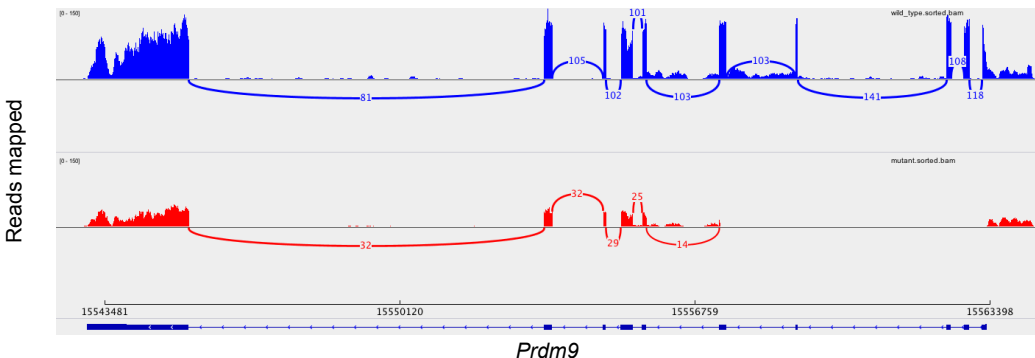

**(A)** XY-linked gene expression

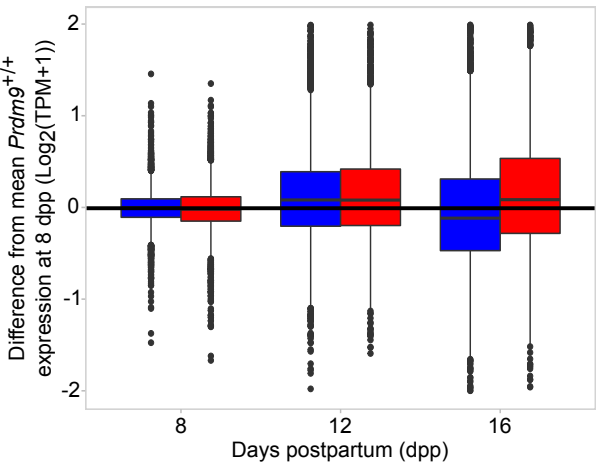

**(B)** Autosome gene expression

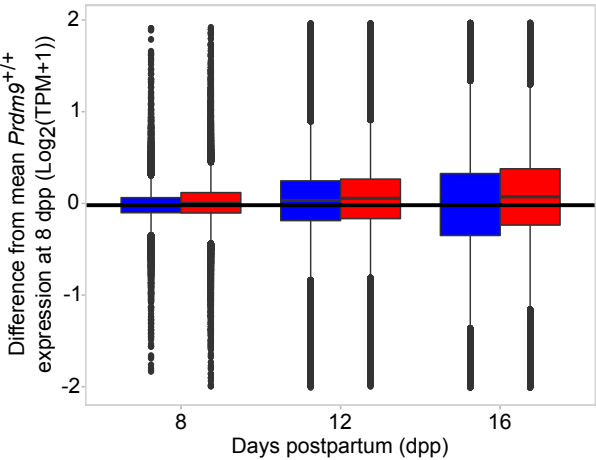

Genotype

◆ *Prdm9*<sup>+/+</sup>

◆ *Prdm9*<sup>-/-</sup>

**(A)** Substage specificity in wild-type

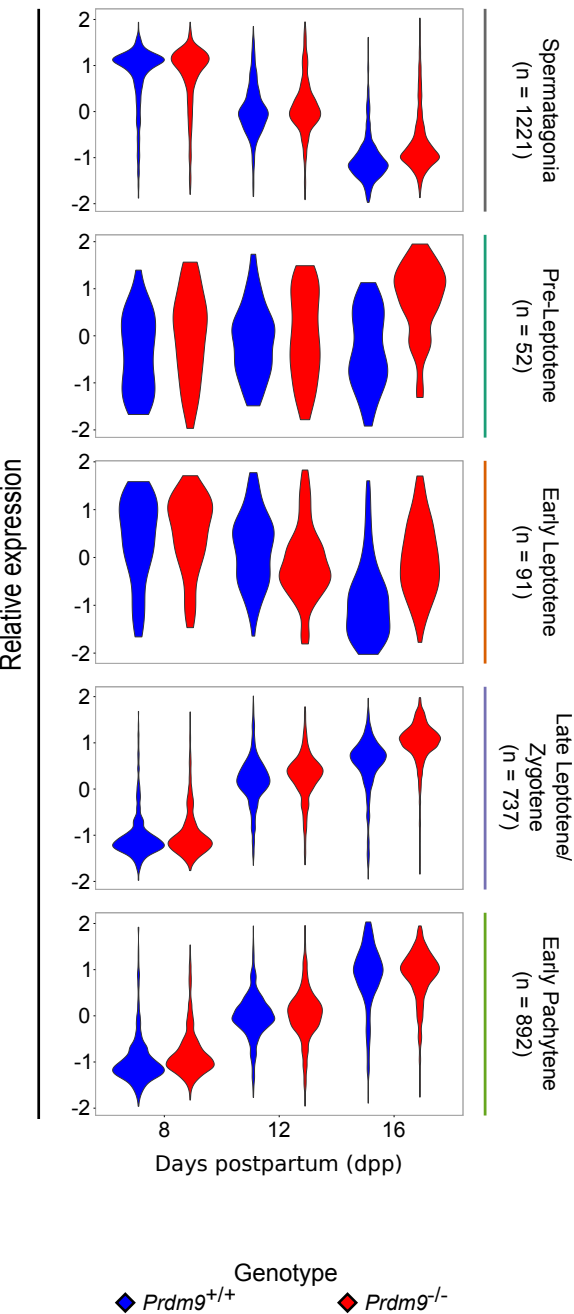

**(B)** Substage specificity in *Prdm9*-KO

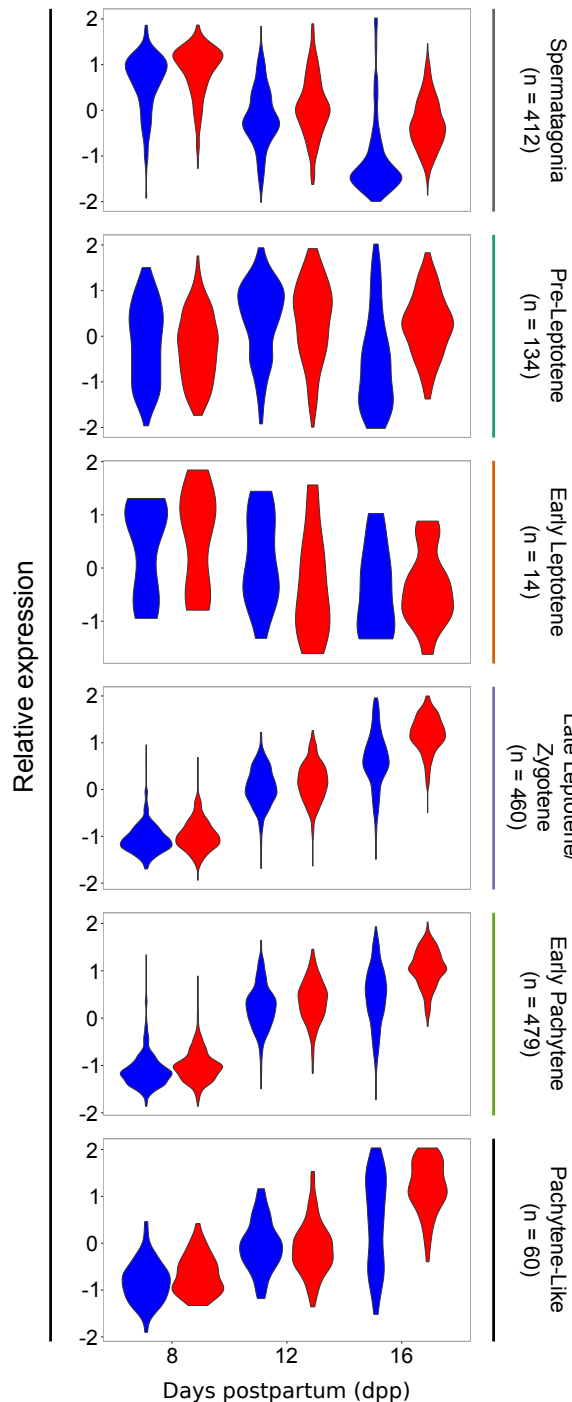

Supplement: mbc-30-717-s001.pdf [file mbc-30-717-s001.pdf]
